# Supplementary material for: Diagnostic and Prognostic Impact of Progesterone Receptor Immunohistochemistry: A Study Evaluating More Than 16,000 Tumors
Source: Hindawi journal article supplement (doi:10.1155/2022/6412148), 2022-08-08

Antibody:  
MSVA-570R

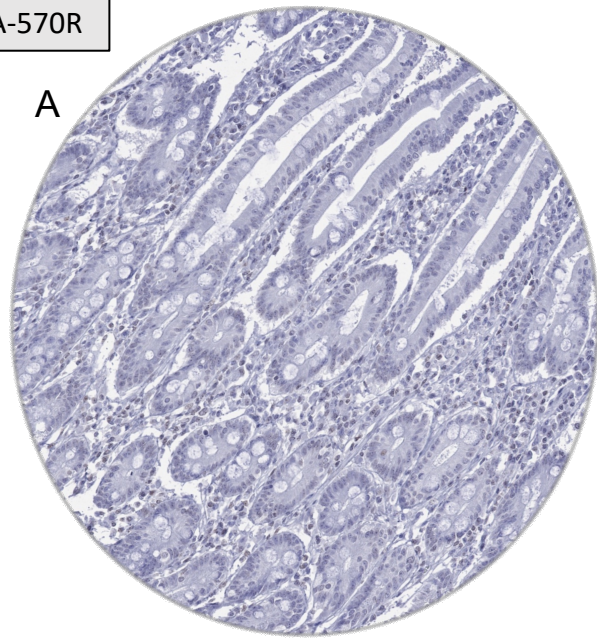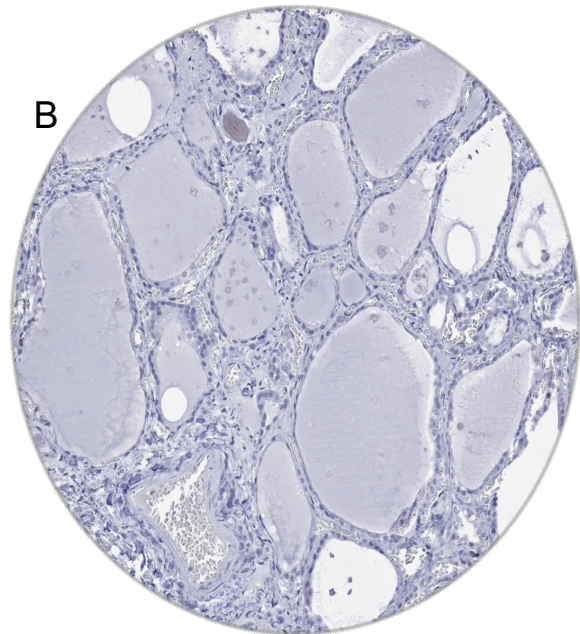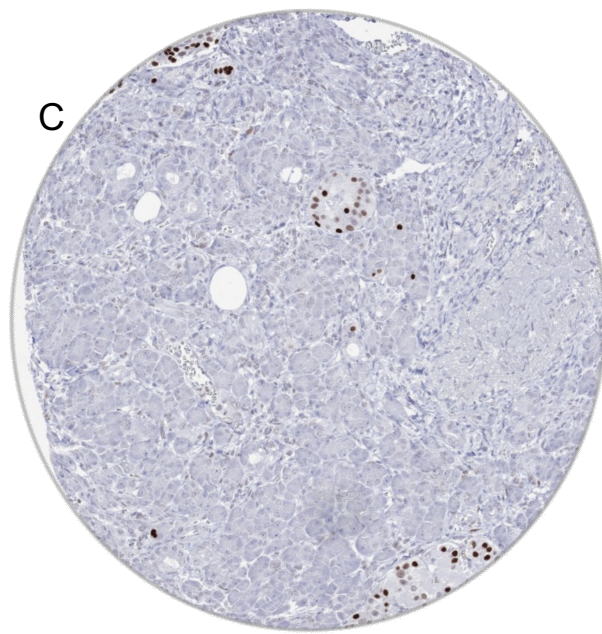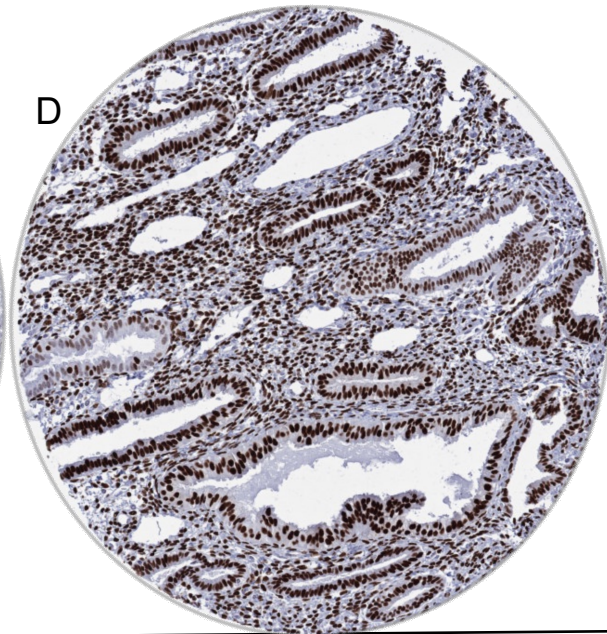

Antibody:  
PgR636

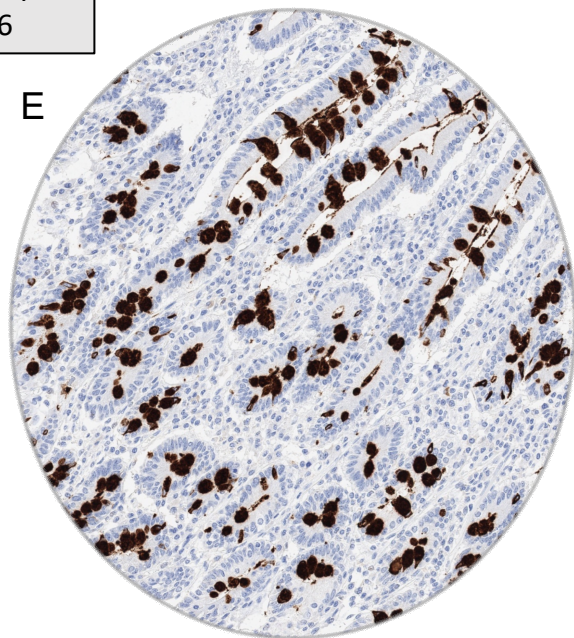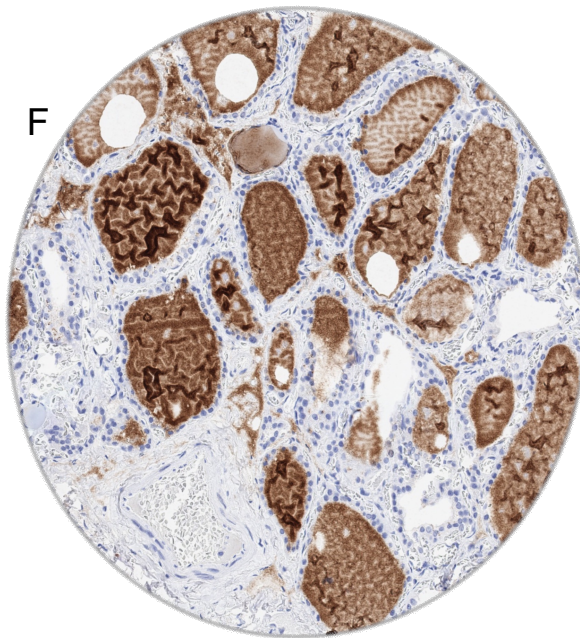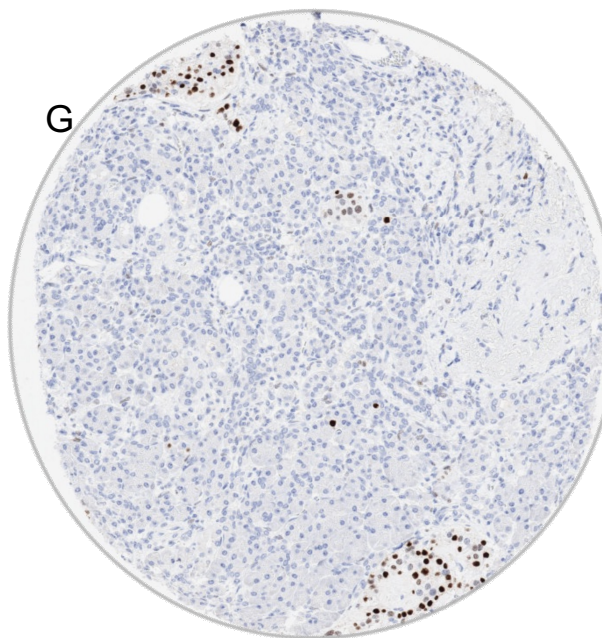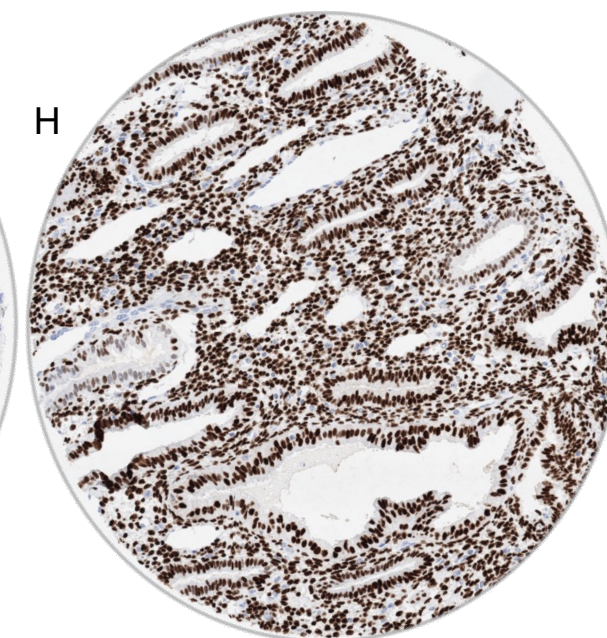

Supplement: f1 [file 6412148.f1.pdf]
