# Supplementary material for: Diagnostic and Prognostic Impact of Progesterone Receptor Immunohistochemistry: A Study Evaluating More Than 16,000 Tumors
Source: Hindawi journal article supplement (doi:10.1155/2022/6412148), 2022-08-08

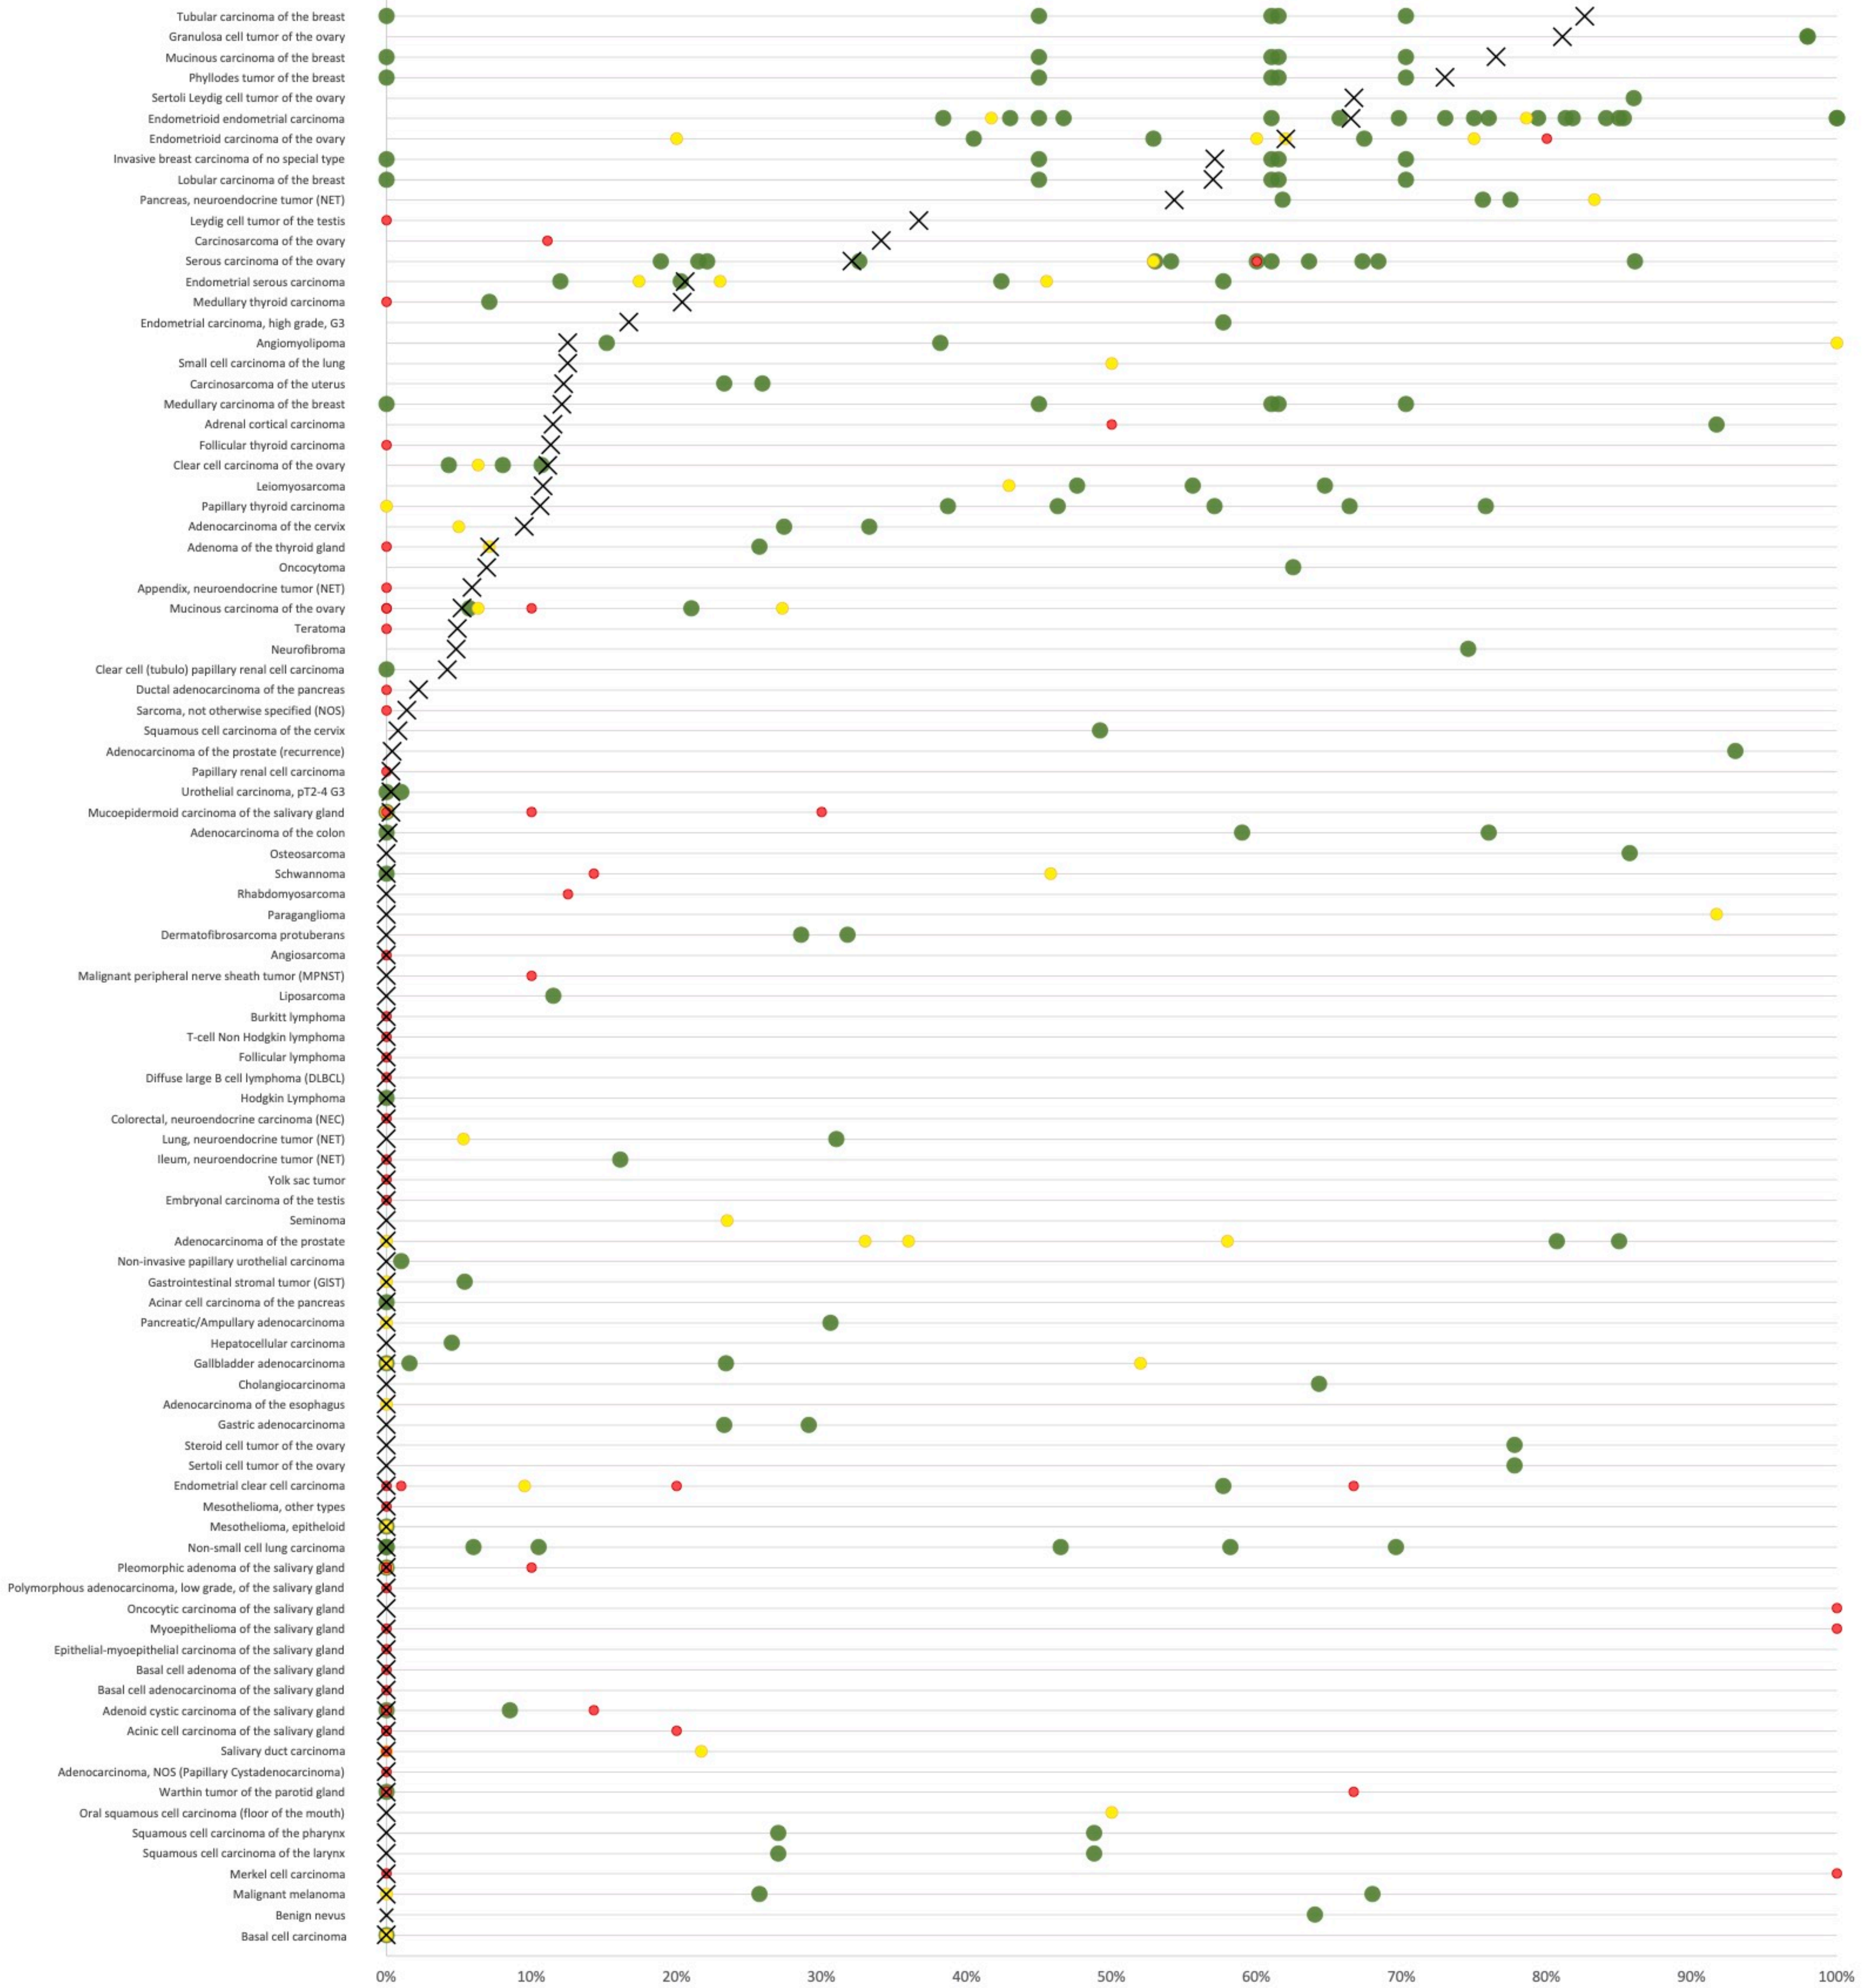

Supplement: f3 [file 6412148.f3.pdf]
